# Supplementary material for: Stability of pyruvic acid clusters upon slow electron attachment
Source: Royal Society of Chemistry journal article supplement (doi:10.1039/d0cp06464e), 2021-01-01
Supplement: d0cp06464e1.pdf [file d0cp06464e1.pdf]

## Stability of pyruvic acid clusters upon slow electron attachment

Andryi Pysanenko,<sup>1</sup> Kateryna Grygoryeva,<sup>1</sup> Jaroslav Kočišek,<sup>1</sup> Ragesh Kumar T. P.,<sup>1</sup> Juraj Fedor,<sup>1\*</sup> Milan Ončák,<sup>2\*</sup> and Michal Fárník<sup>1\*</sup>

<sup>1</sup> J. Heyrovský Institute of Physical Chemistry of the Czech Academy of Sciences, Dolejškova 3, 18223 Prague, Czech Republic, E-mails: [juraj.fedor@jh-inst.cas.cz](mailto:juraj.fedor@jh-inst.cas.cz), [michal.farnik@jh-inst.cas.cz](mailto:michal.farnik@jh-inst.cas.cz)

<sup>2</sup> Institut für Ionenphysik und Angewandte Physik, Universität Innsbruck, Technikerstraße 25, 6020 Innsbruck, Austria, E-mail: [milan.oncak@uibk.ac.at](mailto:milan.oncak@uibk.ac.at)

ESI: Electronic Supplementary Information

l) Mass spectra

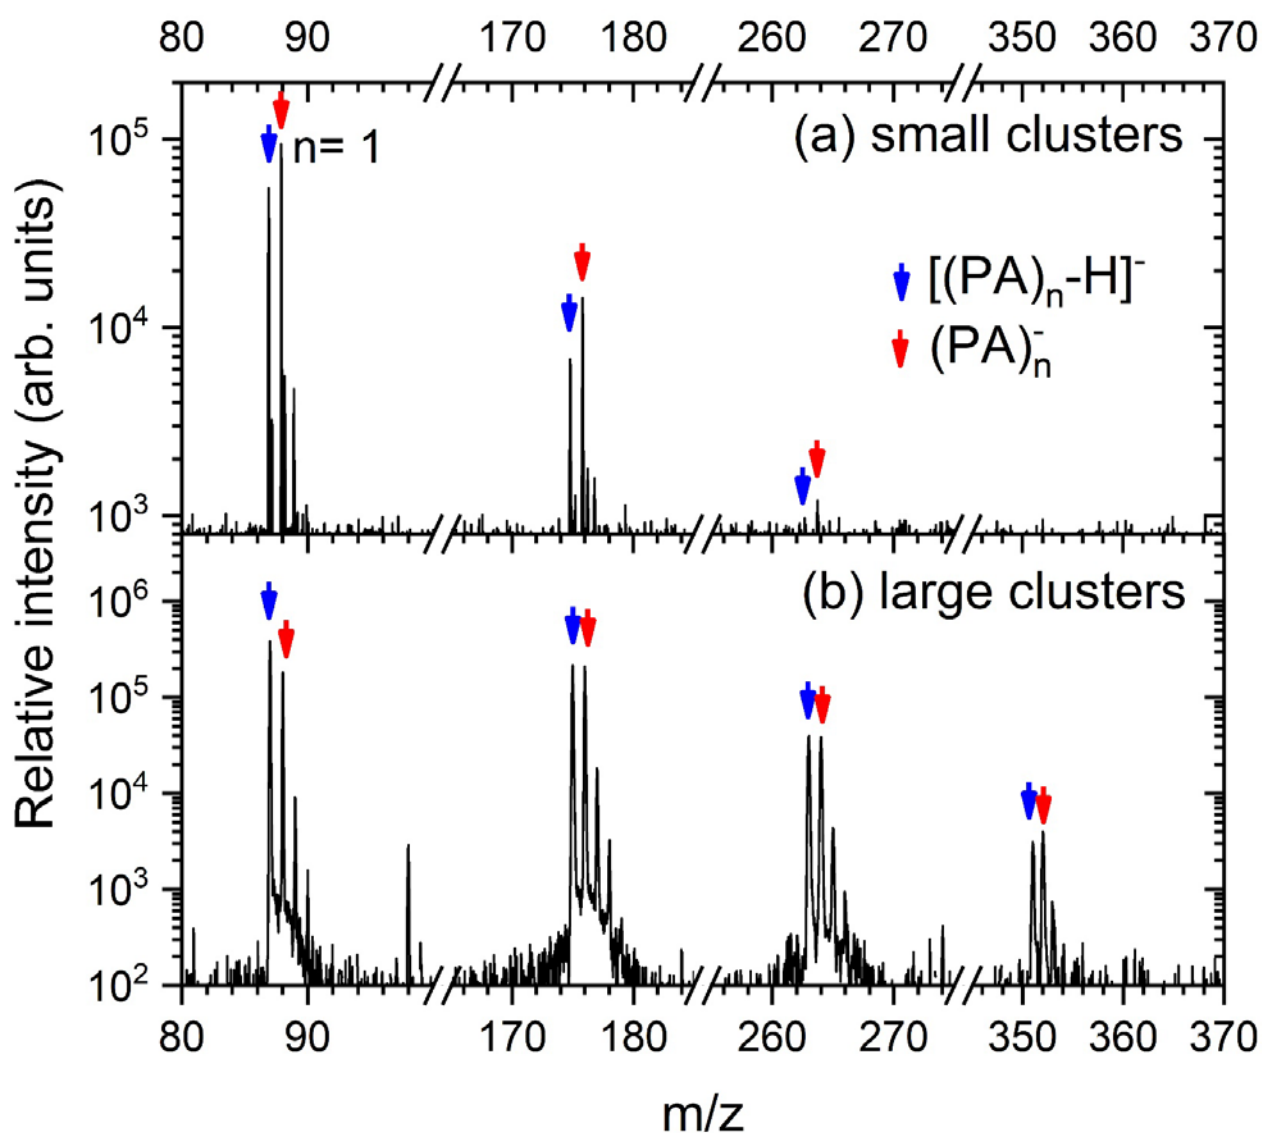

Figure S1: Detailed region around  $(PA)_n^-$  clusters of the mass spectra shown in Fig. 1.

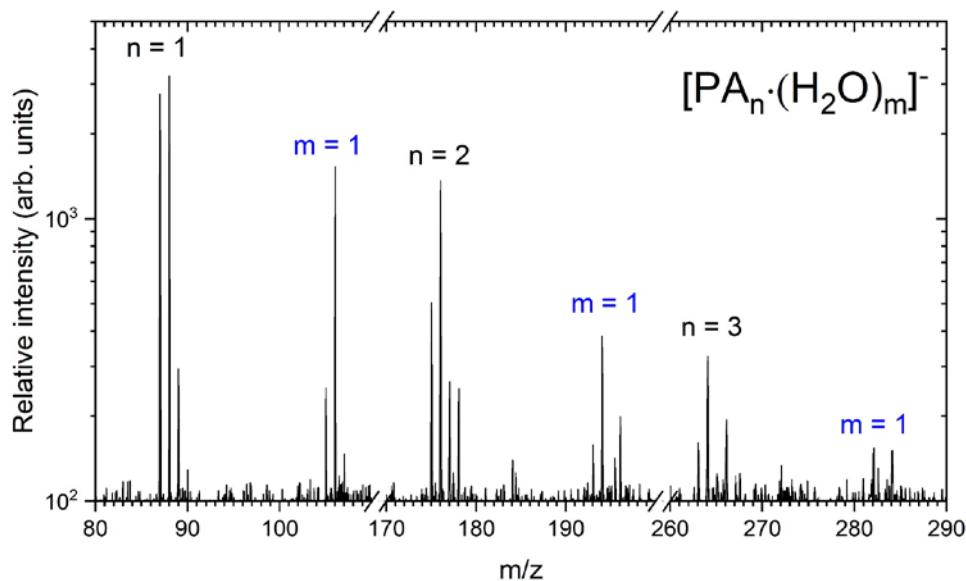

Figure S2: Detailed region around  $[(PA)_n \cdot (H_2O)_m]^-$  clusters of the mass spectra shown in Fig. 4.

## II) Electron energy dependencies

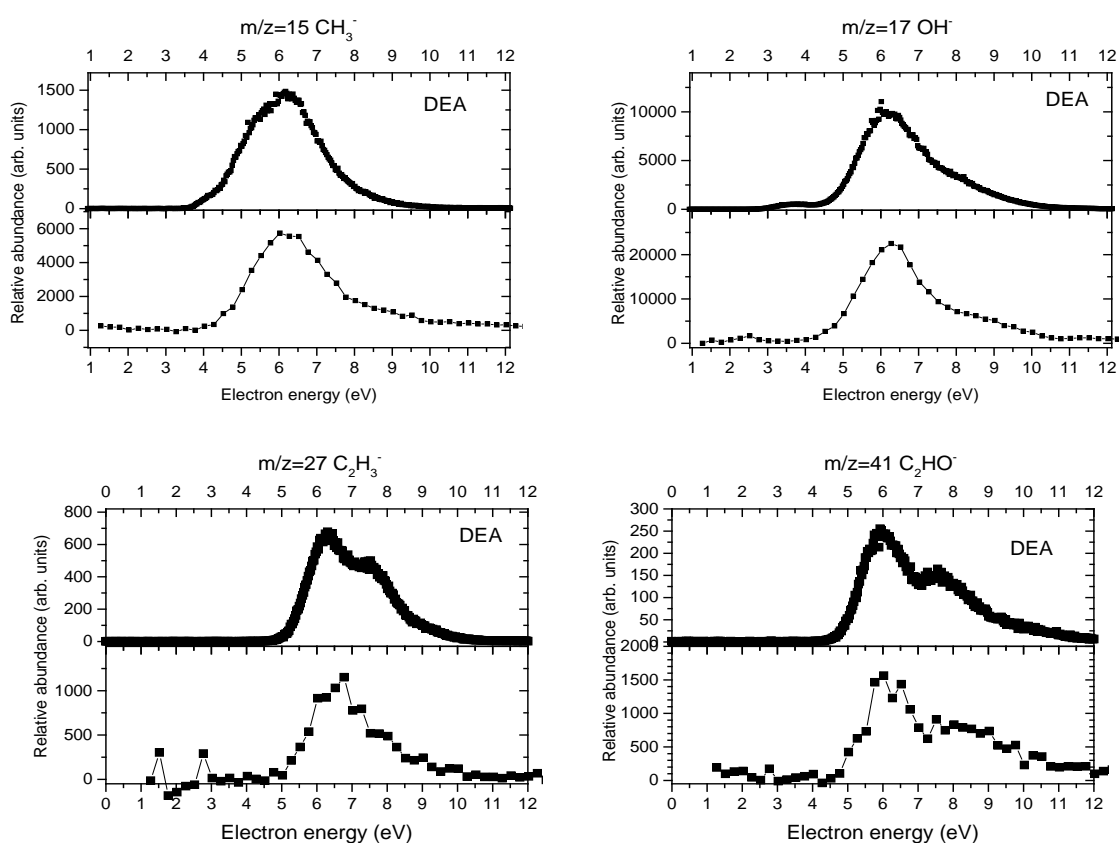

Figure S3: Monomer fragments of the DEA of pyruvic acid molecule in the gas phase (top panel in each figure) in comparison with the same fragment from the attachment of large  $(PA)_N$  clusters (small and intermediate clusters show the same behavior with somewhat worse signal-to-noise ratio). There is no significant difference between these fragments from isolated molecules and clusters. There are isolated molecules present in the cluster beam as well, and the above fragments may come from these isolated molecules also in the cluster experiments.

### III) Theoretical calculations

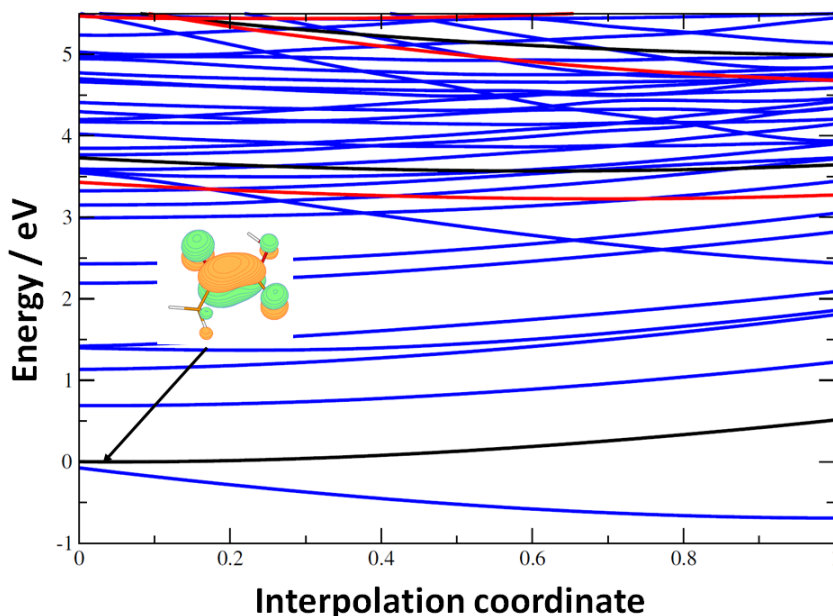

**Figure S4:** Interpolation between minimum of the neutral molecule (left) and of the anion (right). Singlet and triplet electronic states of the neutral molecule (black and red, respectively) and electronic states of the anion (blue) are shown. The ground electronic state was calculated at the CCSD/aug-cc-pVDZ level, excited states at the TD-BHandHLYP/aug-cc-pVDZ level, anionic states were shifted by  $-0.3$  eV based on benchmarking against EOM-CCSD values in the neutral molecule minimum. The singly occupied molecular orbital of the anionic ground state is also shown.

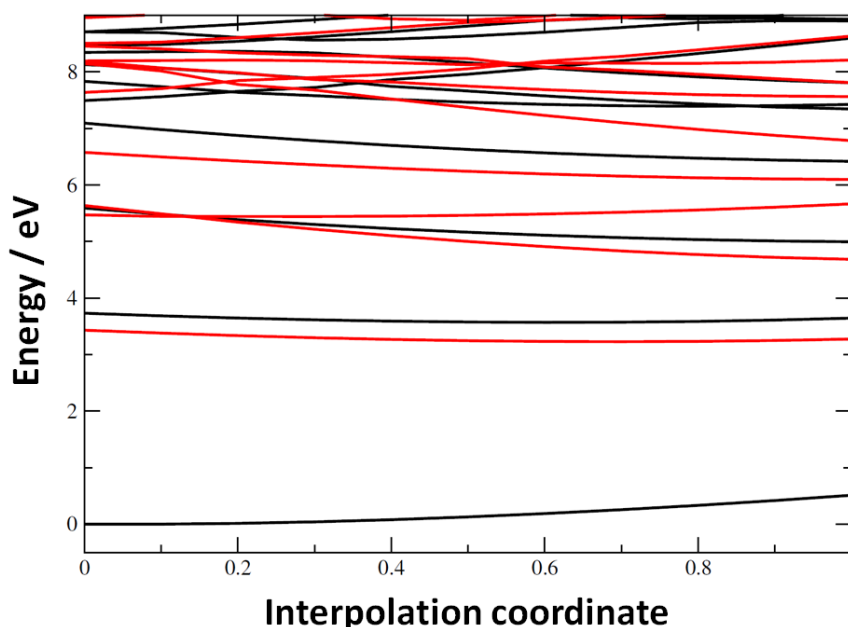

**Figure S5:** Interpolation between minimum of the neutral molecule (left) and of the anion (right). Singlet and triplet electronic states of the neutral molecule (black and red, respectively) are shown. The ground electronic state was calculated at the CCSD/aug-cc-pVDZ level, excited states at the TD-BHandHLYP/aug-cc-pVDZ level.

Cartesian coordinates (in Å) along with zero-point corrected energies (in Hartree) for molecules and ions calculated at the B3LYP/aug-cc-pVDZ level of theory

PA  
E = -342.394085  
C 1.355357 1.375636 0.000000  
C -0.000000 0.738740 0.000000  
O -1.059858 1.337125 0.000000  
C -0.039888 -0.814107 0.000000  
O 0.956789 -1.493556 0.000000  
O -1.282798 -1.314126 0.000000  
H 1.918582 1.026462 0.879238  
H 1.257365 2.466740 0.000000  
H 1.918582 1.026462 -0.879238  
H -1.900406 -0.556819 0.000000

CHO2-  
E = -189.221106  
C -0.000002 0.318829 -0.000000  
O -0.000002 0.210890 1.141308  
O -0.000002 -0.210890 -1.141308  
H 0.000055 1.461274 -0.000000

COCH3  
E = -153.163676  
C 0.244937 -0.432762 -0.000020  
C -1.171065 0.099430 -0.000057  
H -1.690656 -0.297002 -0.884784  
H -1.688813 -0.293009 0.887546  
H -1.179235 1.201970 -0.002278  
O 1.264433 0.173504 -0.000003

CH3COO  
E = -228.518211  
C 0.041061 -1.353586 0.000000  
C 0.000000 0.208479 0.000000  
O -1.157447 0.710972 0.000000  
O 1.115302 0.797414 0.000000  
H 1.076353 -1.729610 0.000000  
H -0.492777 -1.733418 0.887867  
H -0.492777 -1.733418 -0.887867

HCO  
E = -113.859087  
H -0.873221 1.224885 -0.000000  
C 0.062373 0.586931 0.000000  
O 0.062373 -0.593309 -0.000000

CH3COCO-  
E = -266.539328  
C -1.286753 -1.053745 -0.029480  
C -0.396991 0.195569 -0.026838  
C 0.953401 -0.053113 0.336191  
O 2.067793 -0.155325 -0.159419  
O -0.947804 1.346573 -0.033691  
H -0.699189 -1.987974 0.001164  
H -1.885941 -1.025251 -0.957036  
H -1.992729 -1.049024 0.821522

CH2COCHO-  
E = -266.572175  
C 1.565087 -0.792441 -0.000100  
C 0.524120 0.141629 0.000044  
C -0.832959 -0.549690 0.000168  
O -1.927545 -0.005466 -0.000168

O 0.587107 1.406251 0.000066  
H 1.359060 -1.864412 0.000075  
H 2.607753 -0.465263 -0.000387  
H -0.780794 -1.673590 0.000450

OH  
E = -75.740616  
O 0.000000 0.000000 0.108809  
H 0.000000 0.000000 -0.870468

(PA)2  
E = -684.806119  
C -4.145043 -1.165532 0.000172  
C -3.447701 0.168552 0.000096  
O -4.006554 1.240334 0.000022  
C -1.896128 0.102579 0.000049  
O -1.324056 -0.988020 -0.000041  
O -1.310679 1.272520 -0.000116  
H -3.831786 -1.746978 -0.880391  
H -5.228910 -1.008738 0.000594  
H -3.831070 -1.747354 0.880219  
H -0.311594 1.165606 -0.000311  
H 0.311600 -1.165607 -0.000384  
O 1.310688 -1.272527 -0.000290  
C 1.896134 -0.102582 -0.000098  
O 1.324052 0.988012 -0.000118  
C 3.447702 -0.168548 0.000097  
O 4.006557 -1.240328 0.000155  
C 4.145032 1.165540 0.000144  
H 5.228900 1.008753 -0.000165  
H 3.831150 1.747390 -0.879918  
H 3.831674 1.746952 0.880694

CH3COOH  
E = -229.066956  
C 0.000000 0.156101 -0.000000  
O 0.178520 1.353612 -0.000000  
O -1.243791 -0.397939 -0.000000  
H -1.882299 0.333615 -0.000000  
C 1.072432 -0.901852 0.000000  
H 2.055629 -0.420817 0.000000  
H 0.957121 -1.541840 0.886726  
H 0.957121 -1.541840 -0.886726

CO2  
E = -188.602775 in  
O 0.000000 0.000000 1.167441  
C 0.000000 0.000000 0.000000  
O 0.000000 0.000000 -1.167441

CH3-  
E = -39.819720  
C 0.000000 0.000053 -0.127775  
H 0.904685 0.522134 0.255590  
H -0.904677 0.522147 0.255590  
H -0.000008 -1.044602 0.255472

COCOCH  
E = -302.446785  
C -0.474921 0.117709 -0.029600  
C 0.972502 -0.081364 -0.406669  
O 1.972187 -0.066478 0.215647

O -0.973313 1.214555 0.046863  
O -1.114516 -1.064757 0.041947  
H -2.060351 -0.884633 0.181957

OH-

E = -75.808427  
O 0.000000 0.000000 0.107740  
H 0.000000 0.000000 -0.861918

CH3COCO

E = -266.495772  
C 1.389927 -0.983282 -0.030896  
C 0.444906 0.195588 -0.002391  
O 0.783743 1.378383 -0.030934  
C -0.959796 -0.112210 0.268766  
O -2.054057 -0.230291 -0.131552  
H 1.955160 -1.026521 0.912862  
H 2.101422 -0.824480 -0.853273  
H 0.855712 -1.934305 -0.172568

CH2CH-

E = -77.905102  
C 0.763810 -0.194205 0.000000  
C -0.581120 0.025464 0.000000  
H -1.304750 -0.810972 -0.000001  
H -1.083356 1.025170 0.000001  
H 1.291967 0.798246 -0.000001

C2OH-

E = -152.013767  
C -0.004428 0.029728 0.000008  
C -1.267055 -0.127031 -0.000002  
H -2.146589 0.498239 -0.000006  
O 1.221936 0.010697 -0.000003

H2

E = -1.164099 in  
H 0.000000 0.000000 0.380357  
H 0.000000 0.000000 -0.380357

COOH

E = -189.108449  
C -0.000000 0.442884 -0.000000  
O -1.064771 -0.355012 -0.000000  
O 1.161133 0.184127 0.000000  
H -0.770895 -1.290222 0.000000

(PA)2-

E = -684.865227  
C -4.102404 -1.176111 0.000308  
C -3.399868 0.171551 0.000384  
O -4.031002 1.240507 0.000369  
C -1.914437 0.108314 0.000165  
O -1.316612 -0.997225 -0.000033  
O -1.281059 1.276701 0.000162  
H -3.808161 -1.768520 -0.881345  
H -5.187105 -1.007624 0.001326  
H -3.806520 -1.769546 0.880697  
H -0.283789 1.127189 -0.000045  
H 0.283820 -1.127476 -0.000350  
O 1.281110 -1.276806 -0.000414  
C 1.914451 -0.108362 -0.000256  
O 1.316512 0.997129 -0.000088  
C 3.399872 -0.171486 -0.000299  
O 4.031101 -1.240408 -0.000352  
C 4.102347 1.176217 0.000035

H 5.187059 1.007789 -0.000882  
H 3.806543 1.769759 -0.880310  
H 3.807983 1.768500 0.881733

(PA)2-, transferred H+

E = -684.873167  
C 4.061283 -1.192413 0.206955  
C 3.363029 0.155728 0.041005  
C 1.936510 0.124867 -0.038482  
O 1.246284 1.249270 -0.182572  
O 4.027768 1.225241 -0.019563  
O 1.322852 -1.062352 0.037218  
O -1.374041 1.089755 -0.307228  
C -1.879400 -0.054140 -0.157829  
C -3.412843 -0.087817 -0.101530  
C -4.002876 0.332630 1.230672  
O -1.283371 -1.152264 -0.006673  
O -4.100337 -0.410990 -1.054897  
H 3.739727 -1.700054 1.131489  
H 5.143720 -1.011667 0.240428  
H 3.821916 -1.874230 -0.625620  
H 0.248268 1.115888 -0.238061  
H 0.311537 -1.020956 0.001242  
H -5.099094 0.283518 1.194015  
H -3.611198 -0.328596 2.020286  
H -3.662341 1.353686 1.461185

[PA-H]-

E = -341.865942  
C -1.462122 -1.069760 0.004058  
C -0.655086 0.224502 -0.000756  
O -1.210585 1.317490 -0.004645  
C 0.869376 0.014093 -0.000088  
O 1.379392 -0.091598 -1.143429  
O 1.380551 -0.081271 1.143582  
H -1.181659 -1.663991 -0.879841  
H -2.540319 -0.851968 0.000530  
H -1.185901 -1.654012 0.895959

[PA-H]-

E = -341.723128  
C 1.409701 1.268974 0.000000  
C -0.000000 0.759965 0.000000  
O -1.005180 1.432952 0.000000  
C -0.181462 -0.770937 0.000000  
O 0.756746 -1.595273 0.000000  
O -1.334108 -1.295483 0.000000  
H 1.937777 0.874843 0.883353  
H 1.415343 2.364728 0.000000  
H 1.937777 0.874843 -0.883353

[PA+H]-

E = -342.985423  
C 1.704689 -0.950726 0.006758  
C 0.687674 0.176303 -0.007061  
C -0.648277 -0.092274 -0.066653  
O -1.546343 0.981518 -0.005346  
O 1.113103 1.418922 0.022925  
O -1.285213 -1.328631 -0.076165  
H 1.223018 -1.941400 -0.013627  
H 2.336189 -0.867485 0.911613  
H 2.380359 -0.860482 -0.863942  
H -0.908363 1.725707 0.062981  
H -1.748090 -1.430626 0.773396

[PA+H]

E = -342.951728  
C 1.763061 -0.881187 0.000015  
C 0.717127 0.206103 -0.000024  
C -0.670378 -0.107523 -0.000024  
O -1.567290 0.883165 0.000003  
O 1.005720 1.434677 0.000005  
O -1.166727 -1.352786 0.000015  
H 2.402913 -0.765928 0.887746  
H 2.402388 -0.766585 -0.888189  
H 1.314859 -1.882785 0.000438  
H -1.018194 1.699498 0.000032  
H -2.134446 -1.309008 -0.000017

(PA)3

E = -1027.214380  
C 4.039780 2.176727 0.687680  
C 3.355026 1.107760 -0.118645  
O 3.898020 0.122730 -0.564303  
C 1.833828 1.312777 -0.336632  
O 1.224326 2.156227 0.319998  
O 1.317516 0.520298 -1.240665  
O -1.312803 0.807158 -1.301154  
C -1.883846 1.244862 -0.311224  
C -3.328695 0.820366 0.012264  
O -3.628338 -0.348876 -0.140183  
O -1.391195 2.080995 0.572546  
C -4.272262 1.874525 0.505617  
O -1.630870 -2.261833 -0.422313  
C -0.573738 -1.911979 0.292897  
C 0.558416 -2.970113 0.258963  
C 1.934955 -2.441074 0.556639  
O -0.463041 -0.880426 0.936732  
O 0.298814 -4.130955 0.032164  
H 3.895464 3.155247 0.203979  
H 5.104955 1.939290 0.778770  
H 3.564427 2.248546 1.677553  
H 0.327247 0.665461 -1.309501  
H -0.397565 2.184964 0.435288  
H -5.273200 1.450255 0.639396  
H -3.884082 2.278194 1.453453  
H -4.292669 2.713108 -0.208558  
H -2.321971 -1.556419 -0.372337  
H 2.643657 -3.274525 0.609986  
H 2.237135 -1.736399 -0.234094  
H 1.916390 -1.873366 1.498129

(PA)3-

E = -1027.300199  
C 5.140332 -0.173420 0.819013  
C 4.099398 0.491528 -0.058417  
O 4.349836 1.434443 -0.786136  
C 2.697904 -0.137989 0.008652  
O 2.632462 -1.329418 -0.404056  
O 1.765792 0.561836 0.481030  
O -0.457122 -0.680593 0.840447  
C -0.690215 -1.776342 0.145820  
C -2.005237 -2.331749 0.136616  
O -2.989884 -1.742147 0.695099  
O 0.277408 -2.385778 -0.528151  
C -2.246594 -3.642910 -0.578063  
O -2.960271 0.809207 0.873390  
C -2.433606 1.320613 -0.215545  
C -1.986614 2.783281 -0.058148  
C -0.563496 3.044414 -0.482963  
O -2.264027 0.760881 -1.288752

O -2.755206 3.646981 0.324510  
H 4.800304 -0.145782 1.867094  
H 6.105820 0.337704 0.714098  
H 5.217971 -1.232695 0.532390  
H 0.446013 -0.242146 0.657400  
H 1.187837 -1.932545 -0.445557  
H -2.982474 -4.224098 -0.003330  
H -2.679003 -3.444355 -1.573753  
H -1.323631 -4.220763 -0.711808  
H -2.988349 -0.221033 0.803070  
H -0.311136 4.098697 -0.315910  
H 0.126963 2.380259 0.061598  
H -0.463433 2.778915 -1.546138

[PA2-H]+

E = -684.303985  
C -2.324649 1.258684 -0.999872  
C -2.522331 0.252688 0.116421  
C -1.565409 -0.945233 0.052068  
C 1.629221 0.861439 -0.129802  
C 1.493368 1.582238 1.188367  
O -3.378855 0.379231 0.978889  
O -1.868212 -1.868918 -0.712785  
O -0.518012 -0.805846 0.778434  
C 2.426392 -0.457304 -0.081443  
O 1.770022 -1.566584 0.157891  
O 3.635378 -0.387264 -0.254772  
O 1.215726 1.299000 -1.188177  
H -1.270042 1.575830 -1.027563  
H -2.995622 2.117319 -0.861516  
H -2.530743 0.756630 -1.958056  
H 0.757082 -1.372420 0.372206  
H 2.479310 1.651026 1.673114  
H 1.064741 2.579767 1.027241  
H 0.827344 0.979833 1.824295

[PA2+H]+

E = -685.480135  
C -2.599201 1.170477 -0.248419  
C -1.944054 -0.157886 0.074219  
O -2.496604 -0.988949 0.769358  
C -0.512212 -0.377583 -0.494034  
O -0.429180 0.269140 -1.775140  
O -0.296216 -1.734137 -0.635682  
O 2.750085 0.948295 -0.175279  
C 2.004909 -0.059102 -0.058834  
C 0.551899 0.278967 0.459669  
O 0.414493 1.703128 0.393365  
O 2.271204 -1.271165 -0.269510  
C 0.405778 -0.214166 1.900358  
H -1.912227 1.984964 0.022456  
H -3.547432 1.249680 0.297933  
H -2.765634 1.233919 -1.333546  
H 0.691411 -1.846203 -0.599169  
H -0.095728 1.161890 -1.592945  
H 1.233875 0.188815 2.500077  
H -0.546273 0.126462 2.330238  
H 0.436244 -1.309937 1.921012  
H 1.352788 1.955678 0.199283

C5O5H4-

E = -569.134759  
C -3.004820 -0.290777 0.179905  
C -1.519260 -0.489603 -0.038113  
O -1.106785 -1.650711 -0.336872  
C -0.698224 0.713150 0.066843

O -1.277775 1.816235 0.309901  
C 0.793282 0.748667 -0.194348  
O 1.312412 1.787722 -0.584829  
C 1.778632 -0.425214 0.125959  
O 2.900996 -0.170063 0.521897  
O 1.375351 -1.677088 -0.070320  
H -3.187435 0.139397 1.176321  
H -3.516599 -1.255905 0.070628  
H -3.396965 0.442413 -0.541570  
H 0.369738 -1.712001 -0.265078

#### CH3OH

E = -115.693612  
C -0.669864 -0.020100 -0.000220  
O 0.751973 0.122557 -0.000241  
H 1.148126 -0.755949 0.001406  
H -1.029642 -0.549822 -0.899496  
H -1.086466 0.995498 0.001340  
H -1.028620 -0.549586 0.899994

#### C4O4-

E = -453.390020  
C 0.000065 -1.070638 0.000000  
C -1.070429 -0.000107 0.000000  
C 1.070591 0.000022 -0.000000  
C -0.000000 1.070382 -0.000000  
O 2.292855 -0.000093 -0.000000  
O -0.000435 -2.292937 0.000000  
O -2.292779 0.000638 0.000000  
O 0.000189 2.292648 -0.000000

#### C4O3H2-

E = -379.359420  
O 0.000218 0.938572 -0.000035  
C -1.152911 0.117858 0.000056  
C -0.702293 -1.239615 0.000011  
C 0.702345 -1.239299 -0.000023  
C 1.152487 0.118284 0.000114  
H 1.381876 -2.089210 -0.000131  
O -2.276523 0.633042 -0.000027  
O 2.276561 0.632767 -0.000035  
H -1.381682 -2.089207 -0.000045

#### HCOOH

E = -189.762682  
O -1.033971 -0.445666 0.000000  
H -0.665446 -1.346360 -0.000000  
C -0.000000 0.422926 0.000000  
O 1.165081 0.114476 -0.000000  
H -0.383430 1.458323 0.000000

#### C5O4H6-

E = -495.049013  
C -1.627689 -0.095470 0.056124  
O -1.100332 1.097078 0.210760  
C 0.504528 0.967964 0.481527  
C 0.779713 -0.466794 -0.015792  
C -0.555752 -1.186173 0.117991  
O 1.134466 -0.418167 -1.423519  
C 1.931707 -1.112688 0.751521  
O 1.175606 1.929234 0.047890  
O -2.826927 -0.323073 -0.089262  
H 2.829160 -0.484493 0.653874  
H 2.145205 -2.111538 0.338907  
H 1.676114 -1.201216 1.818216  
H -0.640913 -1.684767 1.095847

H -0.715825 -1.932781 -0.669905  
H 1.448722 0.493179 -1.552118

#### C5O3H4-

E = -418.657296  
C 0.438001 1.216352 -0.000006  
C -0.814893 0.580750 -0.000056  
H 0.650602 2.283653 -0.000087  
C 1.458834 0.217021 0.000010  
C -0.585287 -0.832781 -0.000007  
C -2.181818 1.189800 0.000021  
H -2.937462 0.390432 0.000010  
H -2.352369 1.827037 0.888344  
H -2.352384 1.827239 -0.888137  
O -1.363809 -1.796203 -0.000021  
O 0.808233 -1.041992 0.000032  
O 2.693400 0.268793 0.000001

#### H2O

E = -76.423464  
O -0.000000 0.000000 0.117797  
H -0.000000 -0.764159 -0.471188  
H 0.000000 0.764159 -0.471188

#### (PA)2.3H2O, iso I

E = -914.115620  
C 0.947492 2.927996 1.039591  
C 1.048628 2.068169 -0.186544  
C -0.295613 1.490459 -0.701140  
O -0.118220 0.531495 -1.598815  
O 2.078830 1.793910 -0.760892  
O -1.370003 1.893123 -0.289571  
O -2.060290 -1.339336 -1.684084  
O -0.039873 -2.232565 -0.132078  
C 0.620459 -1.418925 0.506730  
C 2.153107 -1.312220 0.314726  
C 2.639647 -1.489940 -1.094589  
O 0.149040 -0.578306 1.399850  
O 2.857853 -1.120985 1.281149  
O -2.344427 -0.910291 1.973926  
H 0.192984 3.713354 0.890701  
H 1.930376 3.350063 1.273900  
H 0.593236 2.296751 1.869786  
H -0.959763 0.038638 -1.780646  
H -0.841046 -0.731121 1.594322  
H 3.734817 -1.498591 -1.108027  
H 2.223515 -2.415750 -1.516786  
H 2.255472 -0.647928 -1.691469  
H -2.938969 -0.453112 1.317905  
H -2.617244 -0.622685 2.851971  
H -1.474860 -1.835693 -1.063385  
H -2.173939 -1.902783 -2.458029  
O -3.668779 0.272890 -0.011199  
H -3.048228 1.006853 -0.177674  
H -3.431720 -0.370709 -0.701508

#### (PA)2.3H2O, iso II

E = -914.116122  
C -4.696785 1.054752 -0.712525  
C -4.106248 -0.326066 -0.581465  
C -2.702110 -0.380135 0.081969  
O -2.289304 -1.597974 0.330716  
O -4.646948 -1.338007 -0.965618  
O -2.091167 0.655860 0.314373  
O 0.051485 -1.872916 1.442405

O 1.808379 0.231317 0.930983  
C 2.624287 0.132516 0.022912  
C 3.244317 -1.246316 -0.343028  
C 4.472831 -1.250558 -1.209145  
O 3.058598 1.108543 -0.735464  
O 2.703336 -2.245089 0.080001  
O -0.057081 2.347551 1.274150  
H -4.766834 1.523361 0.281184  
H -5.683813 0.985599 -1.182590  
H -4.021343 1.689575 -1.305522  
H -1.371037 -1.615294 0.757064  
H 2.558193 1.993457 -0.563641  
H 4.825673 -2.278880 -1.343176  
H 4.235585 -0.786529 -2.178552  
H 5.252045 -0.622928 -0.749602  
H 0.707779 -1.155473 1.337560  
H 0.524436 -2.650372 1.119159  
H 0.541706 1.603789 1.457433  
H -0.855880 1.904123 0.936208  
O 1.709533 3.260363 -0.444082  
H 2.117948 4.063113 -0.101229  
H 0.943136 3.044109 0.163687

(PA)2.3H2O, iso III

E = -914.111613  
C -3.716572 1.159955 0.209599  
C -3.449788 -0.316154 0.076599  
C -2.041610 -0.673516 -0.452220  
O -1.614354 -1.852043 -0.091954  
O -4.243791 -1.192537 0.330141  
O -1.431466 0.132082 -1.160705  
O 1.170509 0.196615 -1.112421  
C 1.630885 -0.869658 -0.506130  
C 3.047348 -0.664289 0.077510  
C 3.707102 -1.888550 0.636337  
O 1.049804 -1.941259 -0.380754  
O 3.541207 0.445956 0.086756  
O 2.113855 2.935044 -0.348948  
O -0.498258 2.553771 0.400043  
H -2.923198 1.633643 0.808658  
H -4.700506 1.312597 0.665745  
H -3.678351 1.624920 -0.787472  
H -0.645087 -1.955431 -0.311951  
H 0.185724 0.097674 -1.282784  
H 4.704383 -1.635775 1.011084  
H 3.073462 -2.298453 1.437638  
H 3.759139 -2.666664 -0.140441  
H -0.922196 2.190515 -0.388515  
H 0.416758 2.783680 0.116967  
H 2.707556 3.514095 0.141232  
H 2.528125 2.052417 -0.318903  
H -0.165532 1.079893 1.304540  
O 0.003568 0.168678 1.640520  
H -0.133057 0.209703 2.592601

(PA)2.3H2O, iso IV

E = -914.112156  
C -4.557238 -0.741024 0.753805  
C -3.752510 -0.156306 -0.377424  
C -2.213141 -0.172515 -0.171063  
O -1.535330 0.178442 -1.232141  
O -4.226304 0.318737 -1.383369  
O -1.740765 -0.483054 0.920688  
O 1.041569 0.088012 -0.945853  
C 1.911066 0.784402 -0.417774  
C 1.573550 2.138192 0.263762

C 0.107751 2.448048 0.423309  
O 3.176802 0.486052 -0.381273  
O 2.464953 2.872846 0.620725  
O 3.588208 -1.948639 -1.154700  
O 1.800927 -3.009196 0.529029  
H -4.249472 -1.783631 0.927771  
H -5.623274 -0.684578 0.509093  
H -4.336912 -0.195310 1.683585  
H -0.540644 0.176289 -1.058834  
H 3.349516 -0.442901 -0.761027  
H -0.000022 3.416421 0.923246  
H -0.383689 2.468508 -0.560535  
H -0.374798 1.653954 1.011166  
H 2.945117 -2.430119 -0.569325  
H 4.461075 -2.297305 -0.940057  
H 1.443964 -2.229000 1.016469  
H 1.042687 -3.401781 0.081667  
O 0.830115 -0.808321 1.850628  
H 0.725080 -0.942935 2.799374  
H -0.076886 -0.671438 1.499855

(PA)2.3H2O-, iso I

E = -914.177831  
C -1.654374 3.290013 0.564280  
C -0.847823 2.352350 -0.319342  
C -1.319828 1.006166 -0.454886  
O -0.560429 0.199015 -1.281986  
O 0.207754 2.775896 -0.887014  
O -2.338425 0.496568 0.128900  
O -0.556716 -2.755250 -1.674626  
O 1.379106 -1.940988 0.054139  
C 1.610683 -0.869859 0.611643  
C 2.800724 -0.010283 0.161994  
C 2.608504 0.724216 -1.126421  
O 0.948705 -0.354411 1.613048  
O 3.811502 0.002736 0.843851  
O -1.447182 -1.146183 2.073098  
H -2.594316 2.832738 0.899330  
H -1.867003 4.216277 0.005639  
H -1.054461 3.571009 1.447049  
H -0.942899 -0.691252 -1.245880  
H 0.058819 -0.830960 1.799520  
H 3.540244 1.233421 -1.403497  
H 2.294957 0.012002 -1.904639  
H 1.767477 1.443797 -1.026455  
H -1.802112 -1.900223 1.564162  
H -1.843801 -0.396965 1.558253  
H 0.154623 -2.558071 -1.026573  
H -0.226301 -2.419409 -2.515254  
O -2.894412 -2.236560 -0.104034  
H -2.845272 -1.254845 -0.156374  
H -2.226494 -2.539713 -0.741889

(PA)2.3H2O-, iso II

E = -914.195880  
C -3.516481 -0.797581 -1.875667  
C -3.755111 -0.197329 -0.501712  
C -2.471487 0.133705 0.274132  
O -2.019945 -0.812936 0.969849  
O -4.875183 0.002029 -0.059482  
O -2.014925 1.286590 0.073821  
O 0.260432 -1.233232 2.265339  
O 2.120881 0.419353 1.050296  
C 2.428924 -0.104280 -0.041239  
C 2.379781 -1.524707 -0.298174  
C 2.929377 -2.163475 -1.533495



O 2.847882 0.628885 -1.094779  
O 1.853374 -2.369205 0.582619  
O 0.259184 2.492152 0.841655  
H -2.912826 -0.094334 -2.470506  
H -4.473295 -1.005790 -2.373092  
H -2.927437 -1.721046 -1.761531  
H -0.606126 -1.029974 1.807583  
H 2.678020 1.599632 -0.924414  
H 3.565608 -3.018873 -1.251753  
H 2.108020 -2.560880 -2.155714  
H 3.507395 -1.446888 -2.125922  
H 0.764399 -0.404877 2.205276  
H 1.239620 -1.922554 1.272967  
H 0.839775 1.749372 1.090959  
H -0.596571 2.056081 0.582533  
O 2.166085 3.208650 -0.821335  
H 2.729578 3.704746 -0.217028  
H 1.331545 3.039098 -0.286292

O 2.662540 -1.915355 -1.465114  
H -3.596273 -1.491489 2.053036  
H -4.444170 -0.039877 1.471399  
H -2.751004 0.078429 2.092259  
H -0.206565 -0.546699 -1.445877  
H 2.786370 0.543415 0.709453  
H -1.383964 3.278612 -1.175382  
H -0.698953 1.803648 -1.979754  
H -1.801420 1.639440 -0.605280  
H 3.686731 -1.226351 0.004831  
H 2.906434 -1.365347 1.281633  
H 2.079773 -2.330849 -0.806570  
H 2.270315 -1.022602 -1.544193  
O 1.228247 -2.146711 1.097121  
H 0.811249 -2.815928 1.648635  
H 0.520682 -1.441823 0.970597

(PA)2.3H20-, iso III

E = -914.193317  
C -3.724138 0.546266 0.104965  
C -3.324873 -0.900890 -0.062056  
C -1.816010 -1.145302 -0.292599  
O -1.245719 -2.042123 0.367521  
O -4.119046 -1.823372 -0.049468  
O -1.277881 -0.376546 -1.151622  
O 1.274365 -0.251231 -1.089498  
C 1.909466 -0.934813 -0.154637  
C 3.239004 -0.542749 0.188829  
C 4.033840 -1.385079 1.167087  
O 1.337551 -1.970748 0.452510  
O 3.758915 0.506978 -0.304521  
O 2.124628 2.650446 -0.741628  
O -0.642601 2.342146 -0.561128  
H -3.126720 1.025850 0.897984  
H -4.796618 0.610663 0.328384  
H -3.485208 1.086419 -0.823579  
H 0.325277 -2.008971 0.331443  
H 0.272200 -0.424479 -1.131070  
H 5.031757 -1.571203 0.740446  
H 4.176111 -0.823698 2.105784  
H 3.541002 -2.337947 1.395217  
H -0.896653 1.438735 -0.819810  
H 0.336457 2.383794 -0.650766  
H 2.419505 3.115041 0.049006  
H 2.642925 1.804947 -0.721335  
H -1.313973 2.694118 0.988953  
O -1.793699 2.906560 1.829569  
H -2.361902 3.645244 1.585919

(PA)2.3H20-, iso IV

E = -914.176549  
C -3.462146 -0.532435 1.521346  
C -2.979119 -0.790899 0.099209  
C -1.547200 -0.676950 -0.126193  
O -1.122074 -0.882957 -1.405213  
O -3.789724 -1.117842 -0.800454  
O -0.699784 -0.390784 0.778772  
O 1.351011 0.553769 -1.208745  
C 1.259592 1.282538 -0.208603  
C 0.145653 2.321011 -0.048161  
C -0.993671 2.263245 -1.029709  
O 2.138544 1.307544 0.772706  
O 0.224857 3.175421 0.825373  
O 3.666651 -0.865790 0.915288
